# Supplementary material for: Prediction of Clinical Outcomes with Explainable Artificial Intelligence in Patients with Chronic Lymphocytic Leukemia
Source: MDPI journal article supplement (doi:10.3390/curroncol30020148), 2023-02-04
Supplement: s1 [file s1]

## Supporting Information:

**Table S1.** Fluorochrome, antigens, and antibody clones.

| Fluorochrome | Tube 1                      | Tube 2         |
|--------------|-----------------------------|----------------|
| FITC         | kappa (RAHK)/ CD8 (B9.11)   | CD103 (2G5)    |
| PE           | lambda (RAHL)/ CD7 (8H8.1)  | CD43 (DFT1)    |
| ECD          | CD23 (9P25)                 | CD25 (B1.49.9) |
| PC5.5        | CD79b (CB3.1) /CD4 (13B8.2) | CD10 (ALB1)    |
| PC7          | CD5 (BL1a)                  | CD200 (OX-104) |
| APC          | CD38 (LS198-4-3)            |                |
| APC-A700     | CD19 (J3.119)               | CD11c (BU15)   |
| APC-A750     | CD20 (B9E9)/ CD3 (UCHT1)    | CD20 (B9E9)    |
| Pacific blue | FMC7 (FMC7) /CD2 (39C1.5)   | IgM (SA-DA4)   |
| Krome Orange | CD45 (J33)                  | CD19 (J3.119)  |

**Table S2.** IPI prediction of the XAI populations.

|                        | IPI≥4 (high) | IPI≤1 (low)  |                  |                    | ROC         |                  |               |
|------------------------|--------------|--------------|------------------|--------------------|-------------|------------------|---------------|
|                        | Mean (%)     | Mean (%)     | SE of Difference | p-value (MWU test) | AUC         | 95%CI            | p-value       |
| <b>CD38+</b>           | <b>41.35</b> | <b>21.36</b> | <b>7.55</b>      | <b>0.0056</b>      | <b>0.66</b> | <b>0.57-0.76</b> | <b>0.0018</b> |
| <i>eAI-populations</i> |              |              |                  |                    |             |                  |               |
| <b>T1C0011</b>         | <b>2.49</b>  | <b>1.69</b>  | <b>0.93</b>      | <b>0.0212</b>      | <b>0.67</b> | <b>0.53-0.80</b> | <b>0.0219</b> |
| T1C0012                | 1.69         | 1.44         | 0.54             | 0.5321             | 0.55        | 0.40-0.69        | 0.5281        |
| <b>T1C0016</b>         | <b>5.37</b>  | <b>12.50</b> | <b>2.42</b>      | <b>0.0008</b>      | <b>0.74</b> | <b>0.63-0.84</b> | <b>0.0010</b> |
| T1C0017                | 7.03         | 4.74         | 1.92             | 0.4278             | 0.56        | 0.41-0.07        | 0.4237        |
| T1C0019                | 5.17         | 6.48         | 1.52             | 0.1839             | 0.60        | 0.45-0.74        | 0.1815        |
| <b>T1C0020</b>         | <b>0.42</b>  | <b>0.15</b>  | <b>0.14</b>      | <b>0.0080</b>      | <b>0.69</b> | <b>0.55-0.83</b> | <b>0.0086</b> |
| <b>T1C0023</b>         | <b>4.30</b>  | <b>0.48</b>  | <b>0.77</b>      | <b>0.0046</b>      | <b>0.70</b> | <b>0.55-0.86</b> | <b>0.0051</b> |
| T2C0001                | 4.01         | 5.01         | 1.98             | 0.9892             | 0.50        | 0.36-0.65        | 0.9868        |
| T2C0002                | 3.05         | 0.93         | 0.97             | 0.3466             | 0.57        | 0.41-0.73        | 0.3429        |
| <b>T2C0004</b>         | <b>8.12</b>  | <b>1.78</b>  | <b>1.84</b>      | <b>0.0029</b>      | <b>0.71</b> | <b>0.58-0.85</b> | <b>0.0033</b> |
| T2C0009                | 0.57         | 1.17         | 0.42             | 0.1602             | 0.60        | 0.47-0.73        | 0.1584        |
| T2C0010                | 0.28         | 0.32         | 0.19             | 0.9169             | 0.51        | 0.36-0.66        | 0.9146        |
| T2C0014                | 11.27        | 10.34        | 2.71             | 0.8283             | 0.52        | 0.37-0.66        | 0.8238        |
| <b>T2C0018</b>         | <b>4.71</b>  | <b>2.27</b>  | <b>0.99</b>      | <b>0.0030</b>      | <b>0.71</b> | <b>0.60-0.82</b> | <b>0.0034</b> |
| T2C0020                | 4.34         | 2.00         | 0.89             | 0.2346             | 0.59        | 0.44-0.73        | 0.2317        |
| T2C0021                | 3.16         | 3.20         | 1.06             | 0.9586             | 0.50        | 0.36-0.65        | 0.9572        |
| T2C0028                | 1.24         | 0.42         | 0.22             | 0.4348             | 0.56        | 0.39-0.72        | 0.4309        |

**Table S3.** Multicollinearity analysis of the four-factor model.

| Multicollinearity | Variable  | VIF   | R2 with other variables |
|-------------------|-----------|-------|-------------------------|
| $\beta_0$         | Intercept |       |                         |
| $\beta_1$         | IPI       | 1.212 | 0.1746                  |
| $\beta_2$         | T1C0016   | 1.039 | 0.03745                 |
| $\beta_3$         | T1C0023   | 1.154 | 0.1333                  |
| $\beta_4$         | CD38      | 1.054 | 0.05092                 |

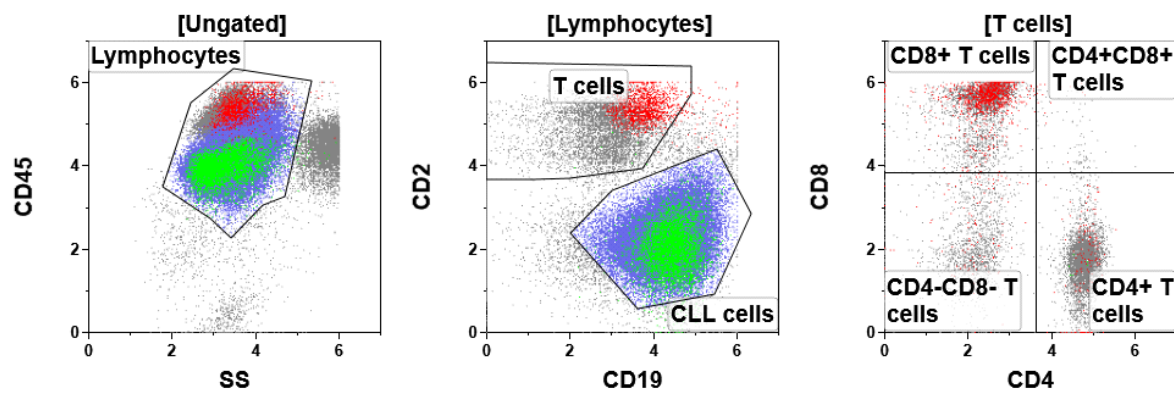

Figure S1. T1C0023 (CD8+ T cells).

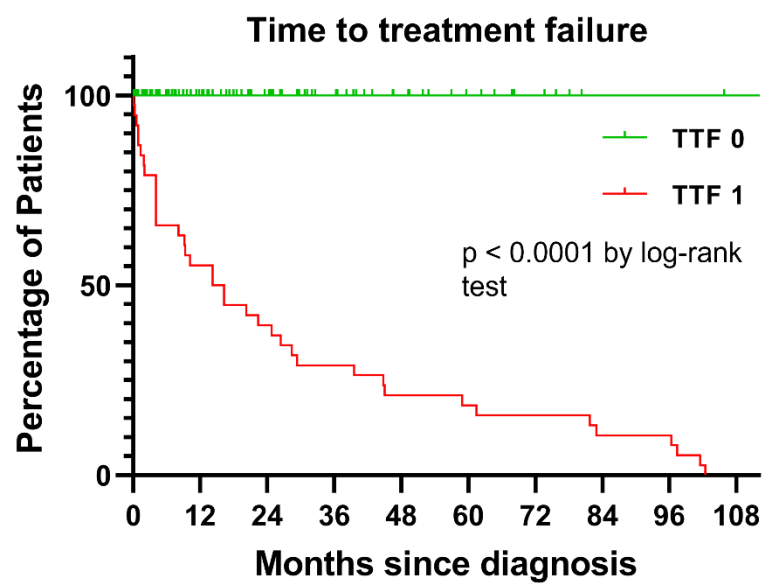

Figure S2. Kaplan-Meier curve .
